# Supplementary material for: Chemotaxonomic Identification of Key Taste and Nutritional Components in ‘Shushanggan Apricot’ Fruits by Widely Targeted Metabolomics
Source: MDPI journal article supplement (doi:10.3390/molecules27123870), 2022-06-16
Supplement: s1 [file s1]

**Table S4.** The test ranges, regression equations, correlation coefficients, and retention time of soluble sugars (sucrose, glucose and fructose) and organic acids (malic acid and citric acid) peaks

| Compound name | Test range (mg/mL) | Regression equation           | Coefficient R <sup>2</sup> | Retention time |
|---------------|--------------------|-------------------------------|----------------------------|----------------|
| Sucrose       | 0.50-5.00          | $Y = 2.20e+006 X + 6.52e+005$ | 0.998848                   | 12.783         |
| Glucose       | 0.50-5.00          | $Y = 1.84e+006 X - 8.11e+005$ | 0.998732                   | 9.197          |
| Fructose      | 0.50-5.00          | $Y = 1.83e+006 X - 9.29e+005$ | 0.997089                   | 11.581         |
| Malic acid    | 0.03215-0.50000    | $Y = 9.56e+005 X + 3.78e+003$ | 0.998801                   | 5.752          |
| Citric acid   | 0.03215-0.50000    | $Y = 1.15e+006 X + 2.43e+004$ | 0.999416                   | 9.847          |
